# Supplementary material for: Immunofluorescent Evidence for Nuclear Localization of Aromatase in Astrocytes in the Rat Central Nervous System
Source: MDPI journal article supplement (doi:10.3390/ijms23168946), 2022-08-11
Supplement: s1 [file s1]

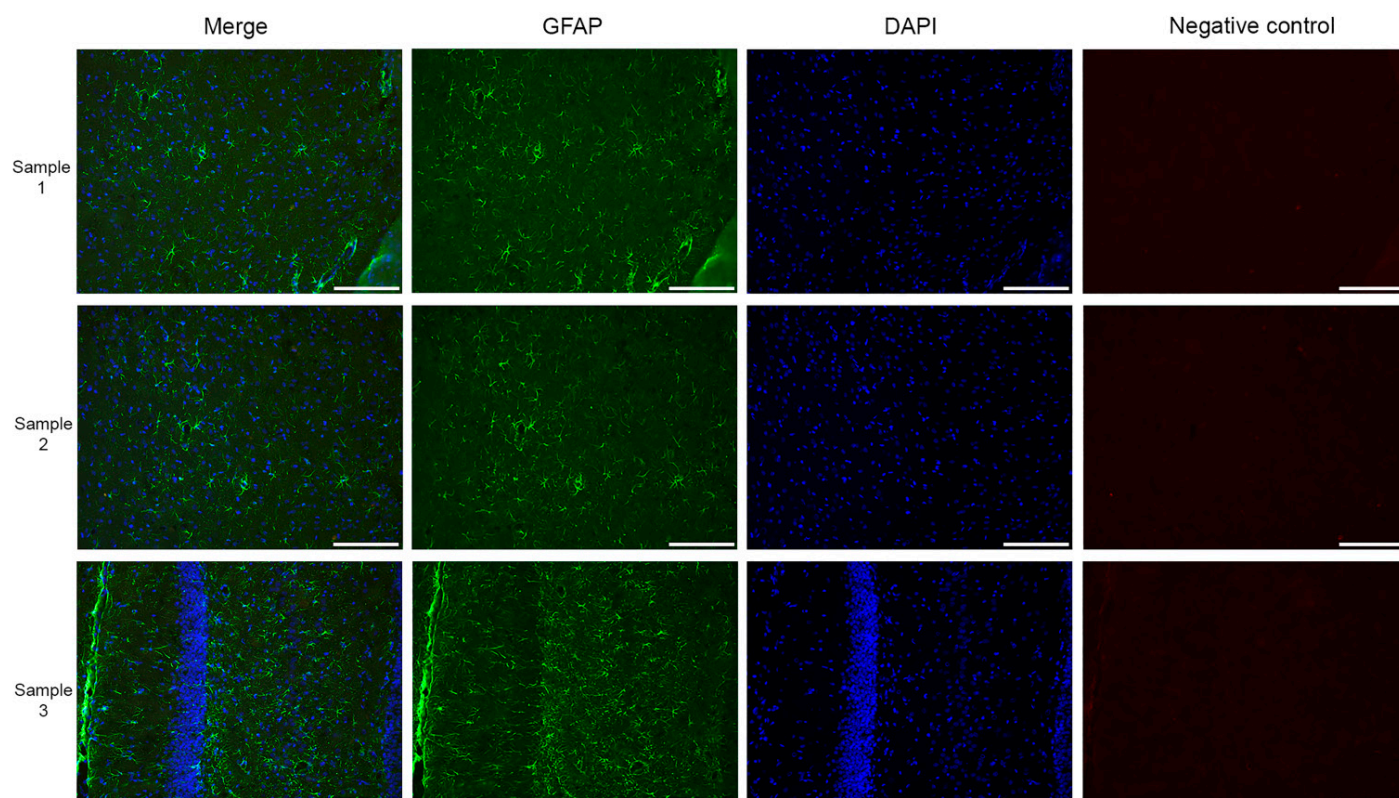

**Figure S1.** Negative control staining of frozen brain tissue section. Immunofluorescent staining on three different frozen samples performed with the method described in the materials section but omitting the primary rabbit-anti Aro antibody. The immunostaining revealed that without the appropriate primary Aro antibody there is no significant background signal which is caused by the secondary Alexa Fluor 568 conjugated anti-rabbit IgG itself. Green: GFAP labeled astrocytes; Blue: Nuclei. Scale bar: 100  $\mu\text{m}$
